# Supplementary material for: Dissolved chloride markedly changes the nanostructure of the protic ionic liquids propylammonium and ethanolammonium nitrate
Source: Royal Society of Chemistry journal article supplement (doi:10.1039/c5cp06947e), 2016-01-01
Supplement: c5cp06947e1.pdf [file c5cp06947e1.pdf]

# Dissolved chloride markedly changes the nanostructure of the protic ionic liquids propylammonium and ethanolammonium nitrate - Supporting Information

Thomas Murphy,<sup>a</sup> Sam K. Callear,<sup>b</sup> Gregory G. Warr,<sup>c</sup> Rob Atkin<sup>a\*</sup>

<sup>a</sup>Discipline of Chemistry, The University of Newcastle, NSW 2308, Callaghan, Australia

<sup>b</sup>STFC, Rutherford Appleton Laboratory, Didcot, UK

<sup>c</sup>School of Chemistry, The University of Sydney, NSW 2006, Australia

\*corresponding author

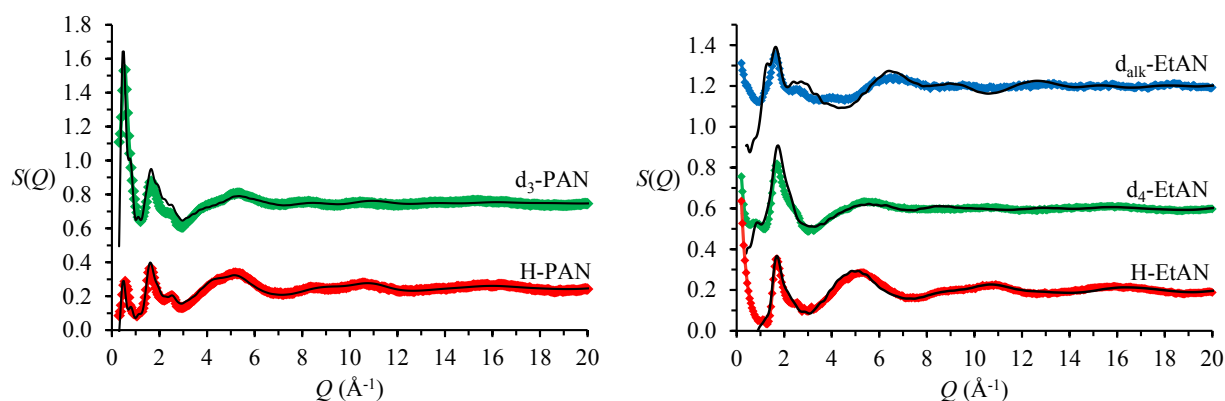

**Figure S1.** Measured (coloured diamonds) and EPSR fits (black lines) for pure propylammonium nitrate, PAN, (left) and pure ethanolammonium nitrate, EtAN, (right).

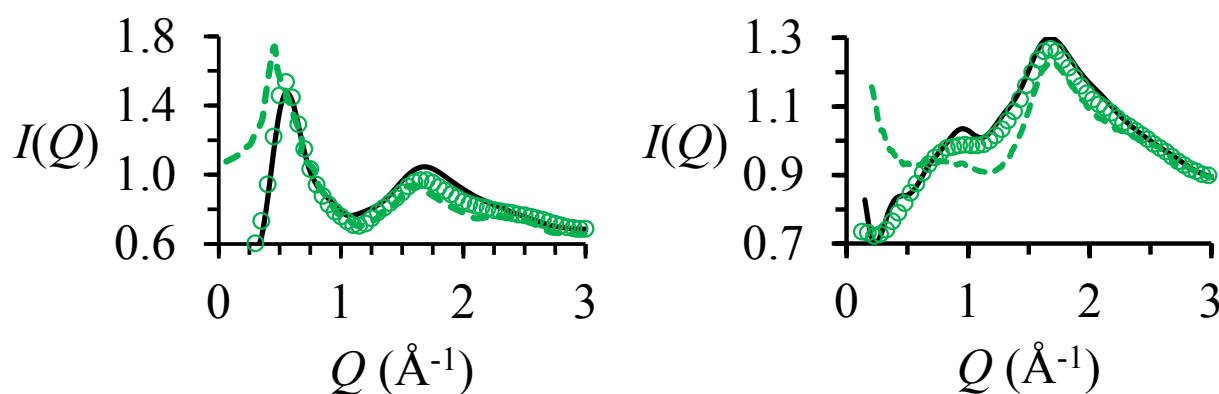

**Figure S2.** Expanded view of the low  $Q$  region (0 – 3  $\text{\AA}$ ) for the  $d_3$ -PAN:PACl contrast (left) and  $d_4$ -EtAN:EtACl contrast (right). Open circles give the measured diffraction data, Solid lines give the EPSR fits and dashed lines give the diffraction data for the respective pure ILs.

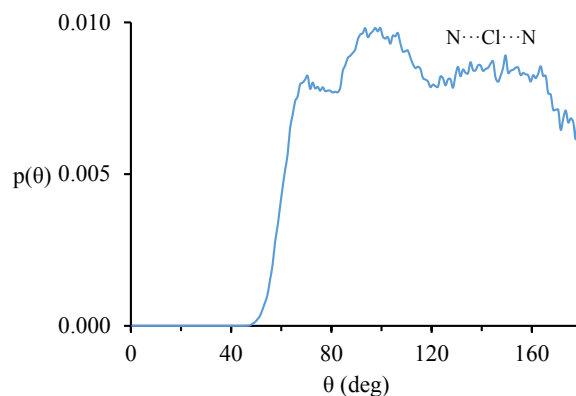

**Figure S3.** Normalized angle probability distribution ( $p(\theta)$ ) for  $N\cdots Cl\cdots N$  triplets. The separation between N and Cl atoms were constrained to only consider atoms within distances closer than the first local minimum in the corresponding  $N\cdots Cl$   $g_{ij}(r)$  data.

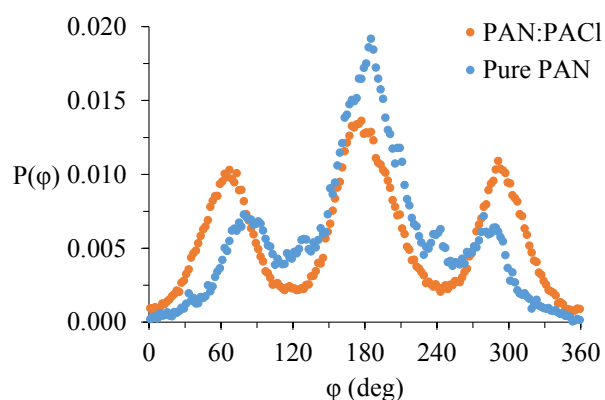

**Figure S4.** Dihedral angle distributions for the propylammonium cation (considering rotation about the  $C_E-C_P$  bond) for cations in a 15 mol% PAN:PACl mixture (blue data) and pure PAN (red data)

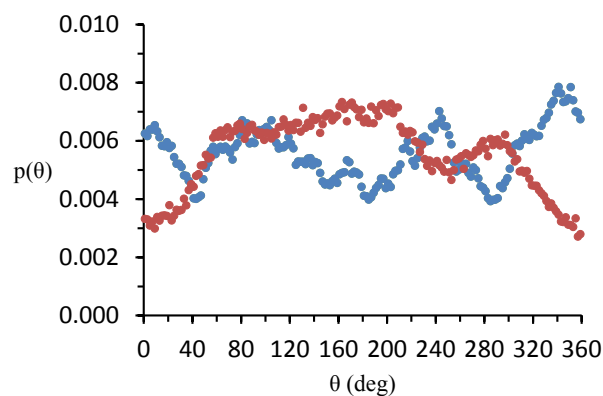

**Figure S5.** Dihedral angle distributions for the ethanolammonium cation (considering rotation about the  $C_1-C_2$  bond) for cations in a 15 mol% EtAN:EtACl mixture (blue data) and pure EtAN (red data)

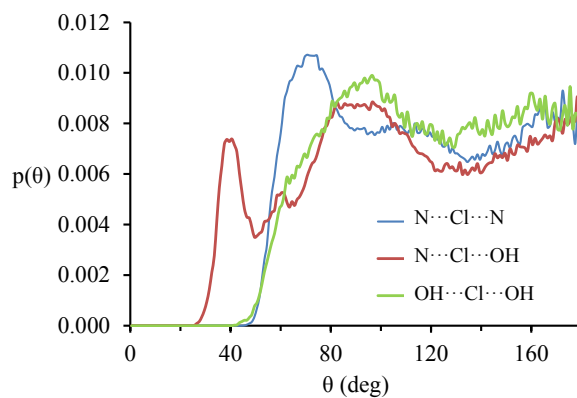

**Figure S6.** Normalized angle probability distribution ( $p(\theta)$ ) for atom cation-chloride-cation atom triplets involving the cation hydroxyl (OH) and ammonium (N) groups. The atom-atom separations were constrained to only consider atoms within distances lower than the first local minima in the corresponding  $g_{ij}(r)$  data.

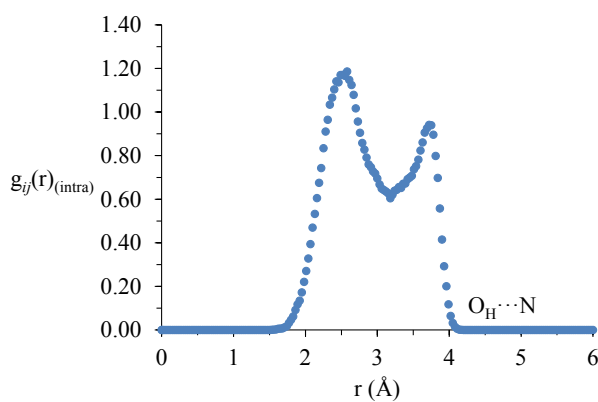

**Figure S7.** Intramolecular  $g_{ij}(r)$  function for the hydroxyl O atom and ammonium N atom correlation for ethanolammonium cations in a 15 mol% EtACl in EtAN mixture.
